# Supplementary material
Source: MDPI journal article supplement (https://www.mdpi.com/2673-7523/2/3/10)

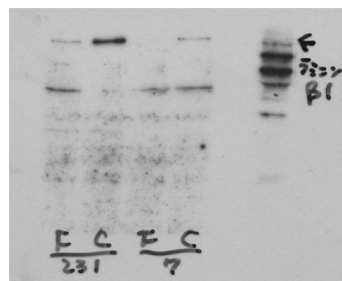

← Laminin β1

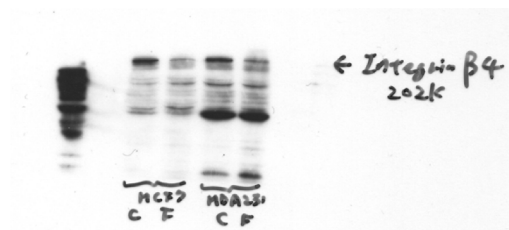

← Integrin β4  
202k ← Integrin β4

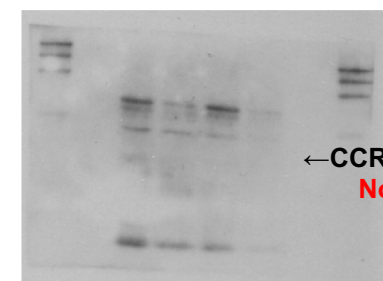

← CCR1  
Not detected

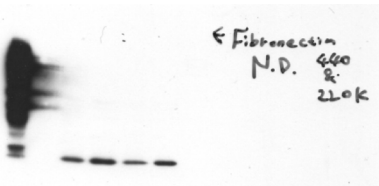

← Fibronectin  
N.D. 440  
20k  
Not detected

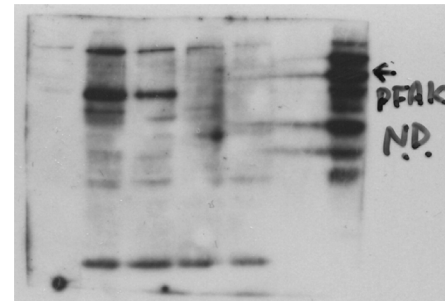

← pFAK(Tyr<sup>397</sup>)  
N.D.  
Not detected

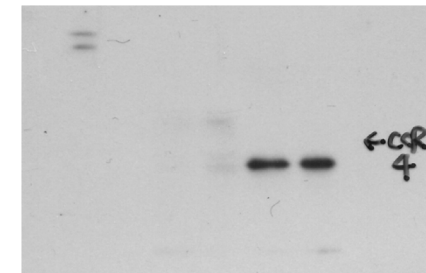

← CCR4  
4  
Not detected

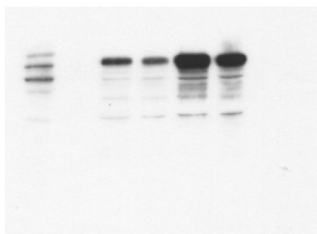

← Integrin α5

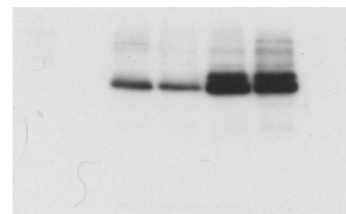

← pPaxillin(Tyr<sup>31</sup>)

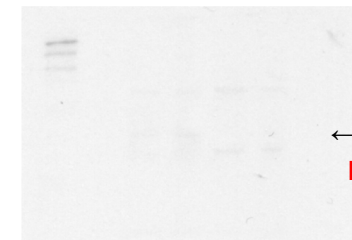

← CCR7  
Not detected

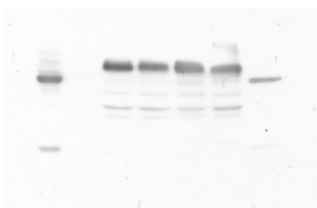

← Integrin β1

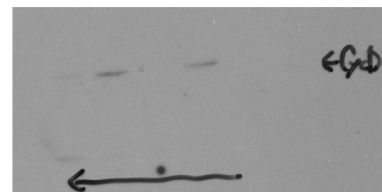

← Cyclin D1

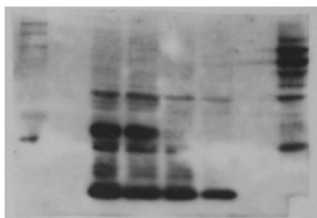

← Integrin α6  
Not detected

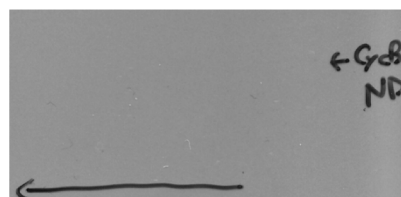

← Cyclin B1  
N.D.  
Not detected

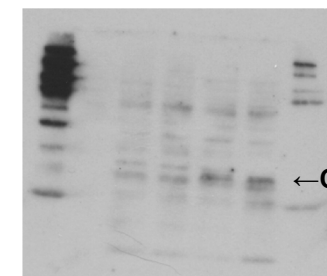

← CXCR4

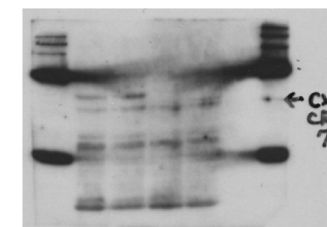

← CXCR7  
7

Onco-1801563., A. Yasuda *et al.*

Figure 7 Original figures. Uncropped, untouched, full original images of western blots.

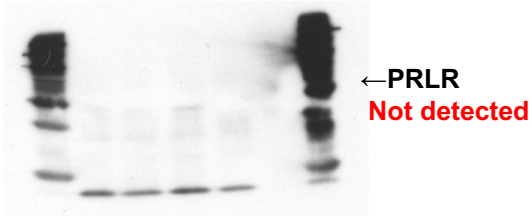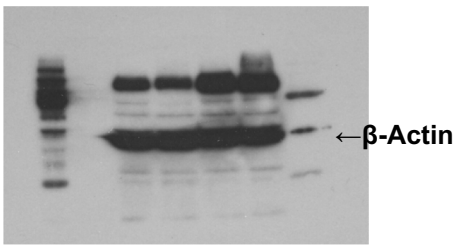

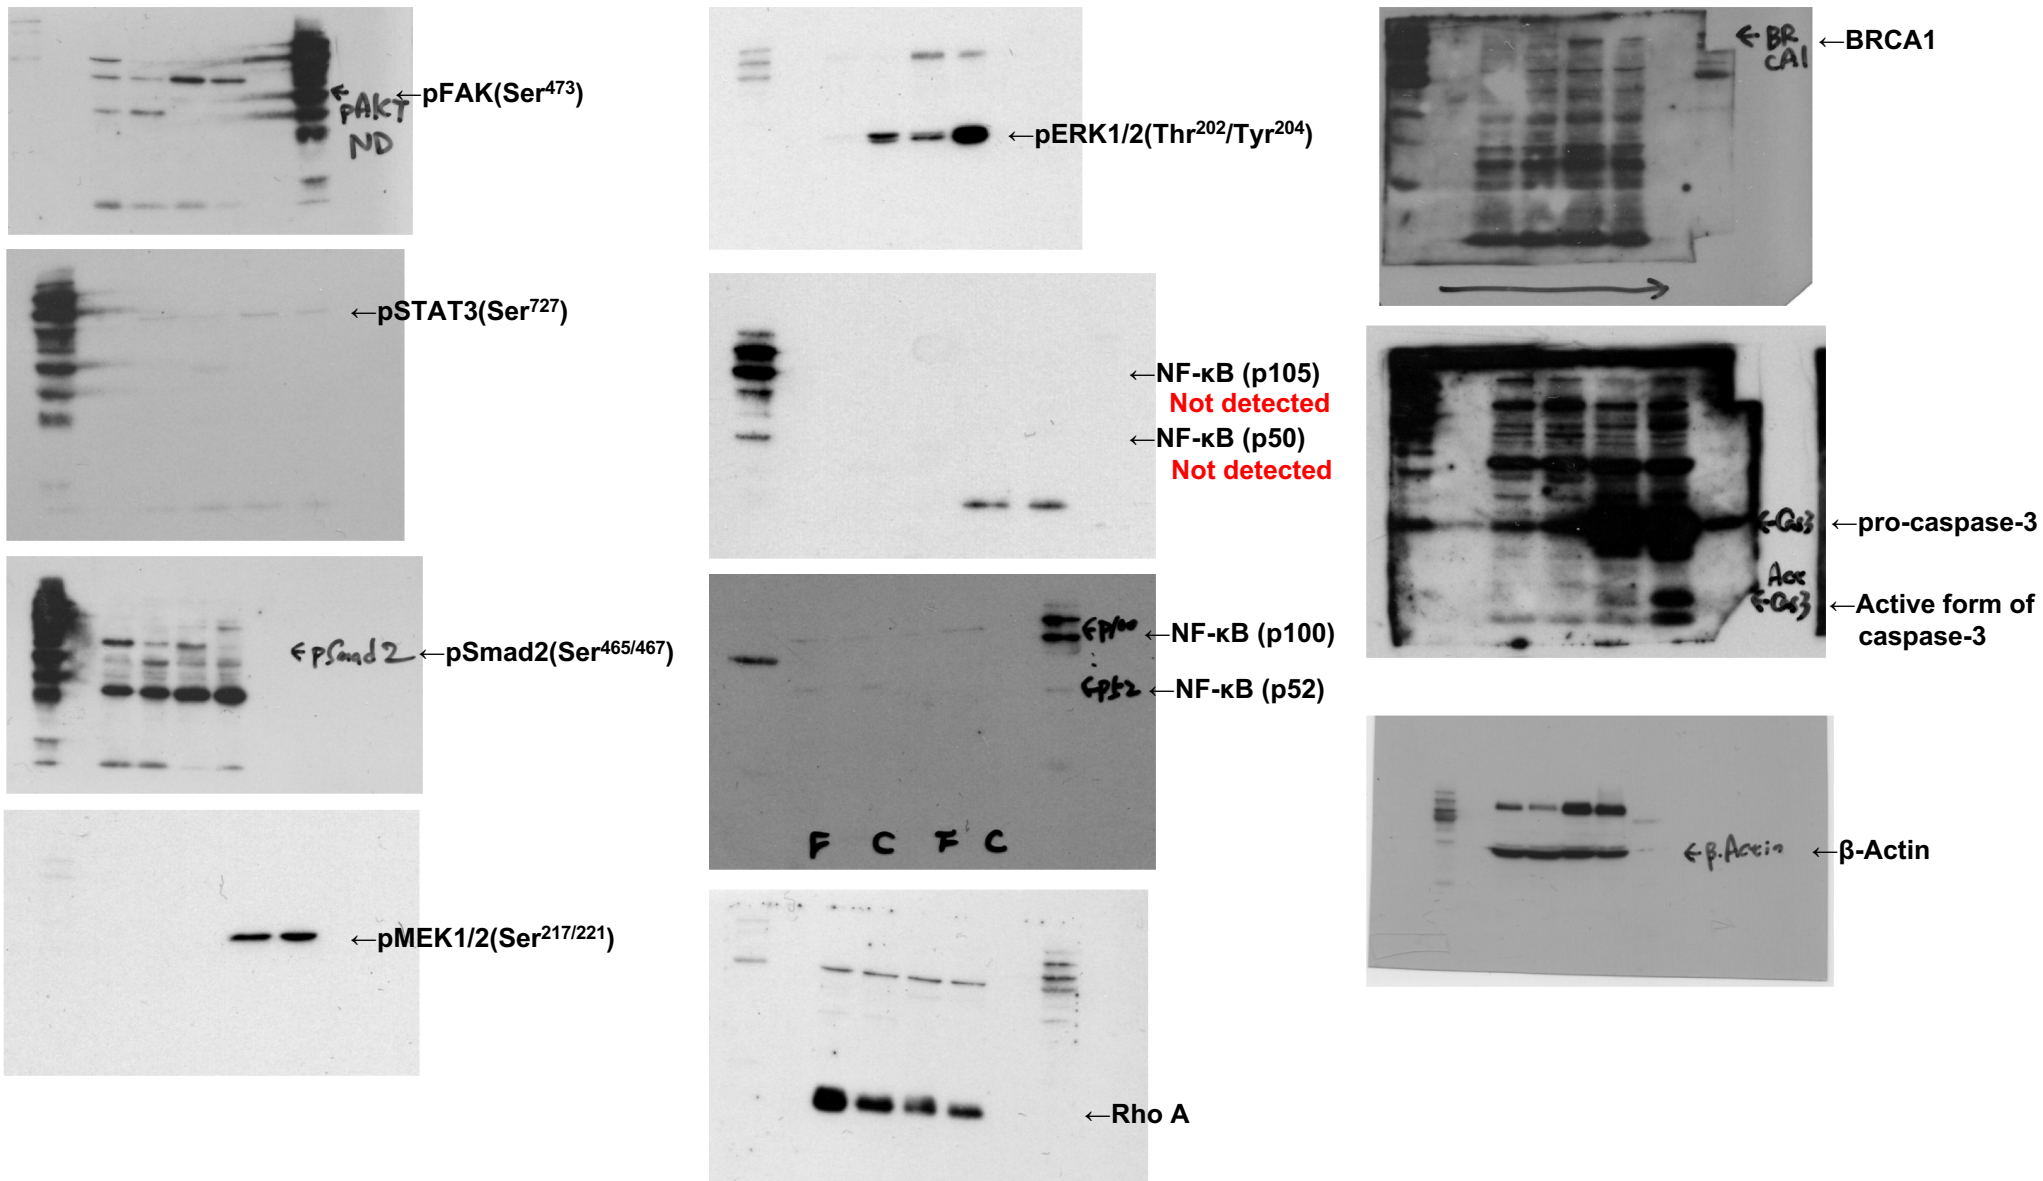

Supplement: s1 [file s1]
