# Supplementary material
Source: MDPI journal article supplement (https://www.mdpi.com/2673-7523/2/3/10)
Supplement: s1 [file s1]

## Supplementary Table S2.

*Downregulated gene profile in human breast cancer MCF-7 cells with fucoxanthinol (FxOH) treatment.<sup>a</sup>*

| No. | Gene symbol      | Description                                                             | Fold <sup>b</sup> | p-Value <sup>c</sup>    |
|-----|------------------|-------------------------------------------------------------------------|-------------------|-------------------------|
| 1   | <i>HIST1H2BM</i> | Histone cluster 1, H2bm                                                 | -71.2             | 2.6 × 10 <sup>-7</sup>  |
| 2   | <i>PRR15L</i>    | Proline rich 15-like                                                    | -31.1             | 4.7 × 10 <sup>-6</sup>  |
| 3   | <i>CACNG4</i>    | Calcium channel, voltage-dependent, gamma subunit 4                     | -30.8             | 4.3 × 10 <sup>-9</sup>  |
| 4   | <i>MYB</i>       | v-Myb avian myeloblastosis viral oncogene homolog                       | -30.4             | 1.1 × 10 <sup>-8</sup>  |
| 5   | <i>RLN2</i>      | Relaxin 2                                                               | -27.7             | 1.8 × 10 <sup>-10</sup> |
| 6   | <i>AOX1</i>      | Aldehyde oxidase 1                                                      | -27.6             | 1.8 × 10 <sup>-10</sup> |
| 7   | <i>SCUBE2</i>    | Signal peptide, CUB domain, EGF-like 2                                  | -25.5             | 9.1 × 10 <sup>-9</sup>  |
| 8   | <i>ADORA1</i>    | Adenosine A1 receptor                                                   | -25.4             | 6.2 × 10 <sup>-10</sup> |
| 9   | <i>HMCN1</i>     | Hemicentin 1                                                            | -24.5             | 5.0 × 10 <sup>-9</sup>  |
| 10  | <i>SLC26A2</i>   | Solute carrier family 26 (anion exchanger), member 2                    | -23.5             | 2.0 × 10 <sup>-10</sup> |
| 11  | <i>KIAA1324</i>  | KIAA1324                                                                | -23.5             | 3.9 × 10 <sup>-10</sup> |
| 12  | <i>HIST1H1B</i>  | Histone cluster 1, H1b                                                  | -23.1             | 3.5 × 10 <sup>-9</sup>  |
| 13  | <i>TOP2A</i>     | Topoisomerase (DNA) II alpha                                            | -23.1             | 7.0 × 10 <sup>-10</sup> |
| 14  | <i>GREB1</i>     | Growth regulation by estrogen in breast cancer 1                        | -20.9             | 2.2 × 10 <sup>-8</sup>  |
| 15  | <i>NCAM2</i>     | Neural cell adhesion molecule 2                                         | -20.3             | 5.5 × 10 <sup>-10</sup> |
| 16  | <i>IGSF3</i>     | Immunoglobulin superfamily, member 3                                    | -18.9             | 1.3 × 10 <sup>-8</sup>  |
| 17  | <i>RFTN1</i>     | Raftlin, lipid raft linker 1                                            | -16.6             | 7.2 × 10 <sup>-10</sup> |
| 18  | <i>PMP22</i>     | Peripheral myelin protein 22                                            | -16.6             | 2.5 × 10 <sup>-9</sup>  |
| 19  | <i>FREM2</i>     | FRAS1 related extracellular matrix protein 2                            | -16.5             | 1.4 × 10 <sup>-8</sup>  |
| 20  | <i>NR2F2</i>     | Nuclear receptor subfamily 2, group F, member 2                         | -16.4             | 6.9 × 10 <sup>-10</sup> |
| 21  | <i>ZFP36L2</i>   | ZFP36 ring finger protein-like 2                                        | -15.2             | 1.7 × 10 <sup>-8</sup>  |
| 22  | <i>IGFBP5</i>    | Insulin like growth factor binding protein 5                            | -14.8             | 4.3 × 10 <sup>-6</sup>  |
| 23  | <i>MBNL3</i>     | Muscleblind-like splicing regulator 3                                   | -14.7             | 1.8 × 10 <sup>-9</sup>  |
| 24  | <i>RBL2</i>      | Retinoblastoma-like 2                                                   | -14.7             | 1.1 × 10 <sup>-9</sup>  |
| 25  | <i>TRPS1</i>     | Transcript Identified by AceView, Entrez Gene ID(s) 7227                | -14.4             | 1.1 × 10 <sup>-8</sup>  |
| 26  | <i>CCNF</i>      | Cyclin F                                                                | -14.3             | 8.2 × 10 <sup>-10</sup> |
| 27  | <i>ST8SLA4</i>   | ST8 alpha-N-acetyl-neuraminide alpha-2,8-sialyltransferase 4            | -14.3             | 1.2 × 10 <sup>-8</sup>  |
| 28  | <i>CDK1</i>      | Cyclin-dependent kinase 1                                               | -14.2             | 1.3 × 10 <sup>-9</sup>  |
| 29  | <i>GFRA1</i>     | GDNF family receptor alpha 1                                            | -14.2             | 1.3 × 10 <sup>-9</sup>  |
| 30  | <i>TMEM150C</i>  | Transmembrane protein 150C                                              | -14.1             | 7.7 × 10 <sup>-9</sup>  |
| 31  | <i>SH3BGRL</i>   | SH3 domain binding glutamate-rich protein like                          | -13.7             | 2.4 × 10 <sup>-9</sup>  |
| 32  | <i>EPHA4</i>     | EPH receptor A4                                                         | -13.7             | 9.5 × 10 <sup>-10</sup> |
| 33  | <i>ESR1</i>      | Estrogen receptor 1                                                     | -13.6             | 7.3 × 10 <sup>-9</sup>  |
| 34  | <i>IL1R1</i>     | Interleukin 1 receptor, type I                                          | -13.6             | 7.7 × 10 <sup>-8</sup>  |
| 35  | <i>PROM2</i>     | Prominin 2                                                              | -13.5             | 1.0 × 10 <sup>-8</sup>  |
| 36  | <i>SFXN2</i>     | Sideroflexin 2                                                          | -13.4             | 1.0 × 10 <sup>-9</sup>  |
| 37  | <i>ST8SLA6</i>   | ST8 alpha-N-acetyl-neuraminide alpha-2,8-sialyltransferase 6            | -13.2             | 4.7 × 10 <sup>-7</sup>  |
| 38  | <i>ABAT</i>      | 4-Aminobutyrate aminotransferase                                        | -13.1             | 4.3 × 10 <sup>-7</sup>  |
| 39  | <i>SPDEF</i>     | SAM pointed domain containing ETS transcription factor                  | -12.9             | 1.2 × 10 <sup>-7</sup>  |
| 40  | <i>SLC24A3</i>   | Solute carrier family 24 (sodium/potassium/calcium exchanger), member 3 | -12.6             | 2.1 × 10 <sup>-7</sup>  |

|                                 |                |                                                   |       |                      |
|---------------------------------|----------------|---------------------------------------------------|-------|----------------------|
| 41                              | <i>FAM234B</i> | Family with sequence similarity 234, member B     | -12.5 | $3.9 \times 10^{-9}$ |
| 42                              | <i>E2F8</i>    | E2F transcription factor 8                        | -12.2 | $3.9 \times 10^{-8}$ |
| 43                              | <i>PRLR</i>    | Prolactin receptor                                | -12.2 | $1.2 \times 10^{-7}$ |
| 44                              | <i>AKAP5</i>   | A kinase (PRKA) anchor protein 5                  | -12.0 | $2.6 \times 10^{-7}$ |
| 45                              | <i>ANXA9</i>   | Annexin A9                                        | -11.8 | $1.4 \times 10^{-8}$ |
| 46                              | <i>CAV1</i>    | Caveolin 1                                        | -11.6 | $1.4 \times 10^{-8}$ |
| 47                              | <i>ATP2A3</i>  | ATPase, Ca <sup>++</sup> transporting, ubiquitous | -11.6 | $8.9 \times 10^{-9}$ |
| 48                              | <i>LMNB1</i>   | Lamin B1                                          | -11.5 | $1.8 \times 10^{-8}$ |
| 49                              | <i>TRGJ1</i>   | T cell receptor gamma joining 1                   | -11.3 | $6.1 \times 10^{-9}$ |
| 50                              | <i>NBEAL2</i>  | Neurobeachin like 2                               | -11.1 | $4.1 \times 10^{-6}$ |
| ECM receptor interaction signal |                |                                                   |       |                      |
|                                 | <i>COL5A1</i>  | Collagen, type V, alpha 1                         | -3.1  | $2.0 \times 10^{-5}$ |
|                                 | <i>LAMA5</i>   | Laminin, alpha 5                                  | -5.6  | $5.2 \times 10^{-5}$ |
|                                 | <i>FN1</i>     | Fibronectin 1                                     | -3.4  | $5.3 \times 10^{-5}$ |
|                                 | <i>THBS1</i>   | Thrombospondin 1                                  | -7.9  | $1.9 \times 10^{-8}$ |
|                                 | <i>DAG1</i>    | Dystroglycan 1                                    | -6.5  | $1.4 \times 10^{-8}$ |
|                                 | <i>ITGB5</i>   | Integrin beta 5                                   | -4.7  | $9.6 \times 10^{-8}$ |
|                                 | <i>LAMB1</i>   | Laminin, beta 1                                   | -3.2  | 0.0007               |
|                                 | <i>AGRN</i>    | Agrin                                             | -3.7  | 0.0002               |
|                                 | <i>HMMR</i>    | Hyaluronan-mediated motility receptor             | -3.2  | 0.0006               |
|                                 | <i>CD47</i>    | CD47 molecule                                     | -3.8  | $4.6 \times 10^{-6}$ |
|                                 | <i>LAMB2</i>   | Laminin, beta 2                                   | -2.7  | 0.0002               |
|                                 | <i>SDC1</i>    | Syndecan 1                                        | -2.9  | $2.8 \times 10^{-6}$ |
|                                 | <i>ITGB4</i>   | Integrin beta 4                                   | -2.5  | $7.1 \times 10^{-6}$ |

<sup>a</sup> Among all 1,966 downregulated genes with significant alterations, the top 50 genes (fold) with 13 genes belonging to ECM receptor interaction signal were shown. <sup>b</sup> Fold change of gene expression in MCF-7 cells with FxOH treatment, compared with that of control cells. <sup>c</sup> Significant difference between MCF-7 cells with and without FxOH treatment using one-way ANOVA ( $n=3$ ).
