# Supplementary material
Source: MDPI journal article supplement (https://www.mdpi.com/2673-7523/2/3/10)
Supplement: s1 [file s1]

# Supplementary Table S4.

*Downregulated gene profile in human breast cancer MDA-MB-231 cells with fucoxanthinol (FxOH) treatment.<sup>a</sup>*

| No. | Gene symbol              | Description                                                                                     | Fold <sup>b</sup> | p-Value <sup>c</sup>    |
|-----|--------------------------|-------------------------------------------------------------------------------------------------|-------------------|-------------------------|
| 1   | <i>HIST1H2BM</i>         | Histone cluster 1, H2bm                                                                         | -104.5            | 4.0 × 10 <sup>-11</sup> |
| 2   | <i>TNFSF10</i>           | Tumor necrosis factor (ligand) superfamily, member 10                                           | -37.0             | 3.7 × 10 <sup>-7</sup>  |
| 3   | <i>CEMIP</i>             | Cell migration inducing protein, hyaluronan binding                                             | -25.1             | 2.1 × 10 <sup>-6</sup>  |
| 4   | <i>SPRY1</i>             | Sprouty RTK signaling antagonist 1                                                              | -14.1             | 4.8 × 10 <sup>-9</sup>  |
| 5   | <i>TMEM19</i>            | Transmembrane protein 19                                                                        | -12.3             | 2.1 × 10 <sup>-9</sup>  |
| 6   | <i>CDH11</i>             | Cadherin 11, type 2, OB-cadherin (osteoblast)                                                   | -12.3             | 9.7 × 10 <sup>-9</sup>  |
| 7   | <i>HIST1H2AG</i>         | Histone cluster 1, H2ag                                                                         | -12.2             | 2.5 × 10 <sup>-10</sup> |
| 8   | <i>FAM111B</i>           | Family with sequence similarity 111, member B                                                   | -11.8             | 5.7 × 10 <sup>-9</sup>  |
| 9   | <i>COL13A1</i>           | Collagen, type XIII, alpha 1                                                                    | -11.2             | 5.5 × 10 <sup>-8</sup>  |
| 10  | <i>PLAU</i>              | Plasminogen activator, urokinase                                                                | -11.1             | 9.6 × 10 <sup>-10</sup> |
| 11  | <i>POLE2</i>             | Polymerase (DNA directed), epsilon 2, accessory subunit                                         | -10.2             | 4.9 × 10 <sup>-8</sup>  |
| 12  | <i>SERTAD4</i>           | SERTA domain containing 4                                                                       | -9.8              | 2.0 × 10 <sup>-8</sup>  |
| 13  | <i>CDK1</i>              | Cyclin-dependent kinase 1                                                                       | -9.5              | 2.7 × 10 <sup>-9</sup>  |
| 14  | <i>HIST1H2AM</i>         | Histone cluster 1, H2am; histone cluster 1, H3j                                                 | -9.2              | 6.3 × 10 <sup>-9</sup>  |
| 15  | <i>SCARA3</i>            | Scavenger receptor class A, member 3                                                            | -9.0              | 5.1 × 10 <sup>-8</sup>  |
| 16  | <i>E2F1</i>              | E2F transcription factor 1                                                                      | -9.0              | 1.5 × 10 <sup>-8</sup>  |
| 17  | <i>UNG</i>               | Uracil DNA glycosylase                                                                          | -8.8              | 4.9 × 10 <sup>-9</sup>  |
| 18  | <i>TBC1D2</i>            | TBC1 domain family, member 2                                                                    | -8.7              | 8.8 × 10 <sup>-9</sup>  |
| 19  | <i>ESCO2</i>             | Establishment of sister chromatid cohesion N-acetyltransferase 2                                | -8.6              | 1.3 × 10 <sup>-9</sup>  |
| 20  | <i>VIPR1</i>             | Vasoactive intestinal peptide receptor 1                                                        | -8.6              | 9.4 × 10 <sup>-9</sup>  |
| 21  | <i>HIST2H3A</i>          | Histone cluster 2, H3a                                                                          | -8.5              | 7.9 × 10 <sup>-9</sup>  |
| 22  | <i>CHAF1B</i>            | Chromatin assembly factor 1, subunit B (p60)                                                    | -8.5              | 2.6 × 10 <sup>-9</sup>  |
| 23  | <i>MCM5</i>              | Minichromosome maintenance complex component 5                                                  | -8.5              | 2.7 × 10 <sup>-8</sup>  |
| 24  | <i>SAA2</i>              | Serum amyloid A2                                                                                | -8.4              | 2.6 × 10 <sup>-6</sup>  |
| 25  | <i>FBXO5</i>             | F-box protein 5                                                                                 | -8.3              | 2.5 × 10 <sup>-9</sup>  |
| 26  | <i>LAMB1<sup>d</sup></i> | Laminin, beta 1                                                                                 | -8.3              | 1.7 × 10 <sup>-9</sup>  |
| 27  | <i>SLCO4A1</i>           | Solute carrier organic anion transporter family, member 4A1                                     | -8.0              | 5.4 × 10 <sup>-8</sup>  |
| 28  | <i>HIST1H2BJ</i>         | Histone cluster 1, H2bj                                                                         | -7.9              | 1.3 × 10 <sup>-8</sup>  |
| 29  | <i>E2F8</i>              | E2F transcription factor 8                                                                      | -7.9              | 1.9 × 10 <sup>-8</sup>  |
| 30  | <i>TOP2A</i>             | Topoisomerase (DNA) II alpha                                                                    | -7.8              | 6.0 × 10 <sup>-9</sup>  |
| 31  | <i>ADGRF5</i>            | Adhesion G protein-coupled receptor F5                                                          | -7.8              | 1.9 × 10 <sup>-7</sup>  |
| 32  | <i>RIN2</i>              | Ras and Rab interactor 2                                                                        | -7.8              | 3.8 × 10 <sup>-7</sup>  |
| 33  | <i>THBS1<sup>d</sup></i> | Thrombospondin 1                                                                                | -7.8              | 5.8 × 10 <sup>-9</sup>  |
| 34  | <i>LMNB1</i>             | Lamin B1                                                                                        | -7.8              | 2.8 × 10 <sup>-8</sup>  |
| 35  | <i>KCNN4</i>             | Potassium channel, calcium activated intermediate/small conductance subfamily N alpha, member 4 | -7.7              | 2.5 × 10 <sup>-7</sup>  |
| 36  | <i>EFEMP1</i>            | EGF containing fibulin-like extracellular matrix protein 1                                      | -7.7              | 3.7 × 10 <sup>-9</sup>  |
| 37  | <i>HIST2H3A</i>          | Histone cluster 2, H3a; histone cluster 2, H3c                                                  | -7.7              | 8.4 × 10 <sup>-9</sup>  |
| 38  | <i>MCM6</i>              | Minichromosome maintenance complex component 6                                                  | -7.5              | 4.7 × 10 <sup>-8</sup>  |
| 39  | <i>SDC3<sup>d</sup></i>  | Syndecan 3                                                                                      | -7.4              | 6.9 × 10 <sup>-9</sup>  |

|                                 |                          |                                                                  |      |                      |
|---------------------------------|--------------------------|------------------------------------------------------------------|------|----------------------|
| 40                              | <i>MYH10</i>             | Myosin, heavy chain 10, non-muscle                               | -7.4 | $7.1 \times 10^{-8}$ |
| 41                              | <i>PLAT</i>              | Plasminogen activator, tissue                                    | -7.3 | $6.0 \times 10^{-9}$ |
| 42                              | <i>TGOLN2</i>            | Trans-golgi network protein 2                                    | -7.3 | $1.5 \times 10^{-8}$ |
| 43                              | <i>CDCA7</i>             | Cell division cycle associated 7                                 | -7.3 | $2.5 \times 10^{-6}$ |
| 44                              | <i>MCM3</i>              | Minichromosome maintenance complex component 3                   | -7.2 | $4.2 \times 10^{-9}$ |
| 45                              | <i>DDX12P</i>            | DEAD/H (Asp-Glu-Ala-Asp/His) box polypeptide 12, pseudogene      | -7.2 | $1.8 \times 10^{-8}$ |
| 46                              | <i>SKP2</i>              | S-Phase kinase-associated protein 2, E3 ubiquitin protein ligase | -7.2 | $2.7 \times 10^{-8}$ |
| 47                              | <i>HIST1H2AB</i>         | Histone cluster 1, H2ab                                          | -7.2 | $6.5 \times 10^{-9}$ |
| 48                              | <i>CTDSP1</i>            | CTD small phosphatase like                                       | -7.2 | $9.4 \times 10^{-9}$ |
| 49                              | <i>NCAPH</i>             | Non-SMC condensin I complex subunit H                            | -7.1 | $7.5 \times 10^{-9}$ |
| 50                              | <i>LAMA5<sup>d</sup></i> | Laminin, alpha 5                                                 | -7.1 | $5.6 \times 10^{-8}$ |
| ECM receptor interaction signal |                          |                                                                  |      |                      |
|                                 | <i>COL6A3</i>            | Collagen, type VI, alpha3                                        | -6.4 | $8.9 \times 10^{-7}$ |
|                                 | <i>LAMA5</i>             | Laminin, alpha 5                                                 | -7.1 | $5.6 \times 10^{-8}$ |
|                                 | <i>LAMB1</i>             | Laminin, beta 1                                                  | -8.3 | $1.7 \times 10^{-9}$ |
|                                 | <i>SDC3</i>              | Syndecan 3                                                       | -7.4 | $6.9 \times 10^{-9}$ |
|                                 | <i>COL5A1</i>            | Collagen, type V, alpha 1                                        | -5.5 | $8.3 \times 10^{-9}$ |
|                                 | <i>ITGB4</i>             | Integrin beta 4                                                  | -5.2 | $9.1 \times 10^{-8}$ |
|                                 | <i>ITGB5</i>             | Integrin beta 5                                                  | -6.2 | $3.8 \times 10^{-9}$ |
|                                 | <i>SDC1</i>              | Syndecan 1                                                       | -4.6 | $1.6 \times 10^{-6}$ |
|                                 | <i>ITGA6</i>             | Integrin alpha 6                                                 | -6.3 | $1.9 \times 10^{-9}$ |
|                                 | <i>LAMA3</i>             | Laminin, alpha 3                                                 | -3.2 | $1.3 \times 10^{-7}$ |
|                                 | <i>THBS1</i>             | Thrombospondin 1                                                 | -7.8 | $5.8 \times 10^{-9}$ |
|                                 | <i>ITGB8</i>             | Integrin beta 8                                                  | -2.0 | 0.0003               |
|                                 | <i>DAG1</i>              | Dystroglycan 1                                                   | -4.5 | $1.3 \times 10^{-8}$ |
|                                 | <i>COL4A1</i>            | Collagen, type IV, alpha 1                                       | -2.2 | 0.0002               |
|                                 | <i>AGRN</i>              | Agrin                                                            | -2.2 | $3.1 \times 10^{-6}$ |
|                                 | <i>FN1</i>               | Fibronectin 1                                                    | -2.7 | $1.1 \times 10^{-5}$ |
|                                 | <i>CD44</i>              | CD44 molecule                                                    | -2.5 | $4.8 \times 10^{-5}$ |
|                                 | <i>ITGAV</i>             | Integrin alpha V                                                 | -2.7 | $5.0 \times 10^{-6}$ |
|                                 | <i>LAMC2</i>             | Laminin, gamma 2                                                 | -2.9 | $1.2 \times 10^{-5}$ |
|                                 | <i>COL6A1</i>            | Collagen, type VI, alpha 1                                       | -2.6 | $3.8 \times 10^{-5}$ |
|                                 | <i>LAMB3</i>             | Laminin, beta 3                                                  | -2.7 | $7.7 \times 10^{-7}$ |
|                                 | <i>CD47</i>              | CD47 molecule                                                    | -2.3 | $3.1 \times 10^{-6}$ |
|                                 | <i>ITGA3</i>             | Integrin alpha 3                                                 | -2.8 | $4.1 \times 10^{-7}$ |
|                                 | <i>ITGB1</i>             | Integrin beta 1                                                  | -2.7 | $7.3 \times 10^{-7}$ |

<sup>a</sup> Among all 1,702 downregulated genes with significant alterations, the top 50 genes (fold) with 24 genes belonging to ECM receptor interaction signal were shown. <sup>b</sup> Fold change of gene expression in MDA-MB-231 cells with FxOH treatment, compared

with that of control cells. <sup>c</sup> Significant difference between MDA-MB-231 cells with and without FxOH treatment using one-way ANOVA ( $n=3$ ). <sup>d</sup> The genes were overlapped with the genes list of ECM receptor interaction signal
