# Supplementary material
Source: MDPI journal article supplement (https://www.mdpi.com/2673-7523/2/3/10)
Supplement: s1 [file s1]

### Supplementary Table S3.

*Upregulated gene profile in human breast cancer MDA-MB-231 cells with fucoxanthinol (FxOH) treatment.<sup>a</sup>*

| No. | Gene symbol             | Description                                                                           | Fold <sup>b</sup> | p-Value <sup>c</sup>    |
|-----|-------------------------|---------------------------------------------------------------------------------------|-------------------|-------------------------|
| 1   | <i>HMOX1</i>            | Heme oxygenase 1                                                                      | 214.7             | 6.5 × 10 <sup>-11</sup> |
| 2   | <i>HSPA6</i>            | Heat shock 70kDa protein 6 (HSP70B)                                                   | 207.8             | 1.3 × 10 <sup>-10</sup> |
| 3   | <i>SNAIL</i>            | Snail family zinc finger 1                                                            | 106.3             | 1.3 × 10 <sup>-9</sup>  |
| 4   | <i>GDF15</i>            | Growth differentiation factor 15                                                      | 95.7              | 3.3 × 10 <sup>-12</sup> |
| 5   | <i>DDIT3</i>            | DNA-damage-inducible transcript 3                                                     | 73.0              | 2.9 × 10 <sup>-10</sup> |
| 6   | <i>ID2</i>              | Inhibitor of DNA binding 2, dominant negative helix-loop-helix protein                | 68.7              | 2.9 × 10 <sup>-11</sup> |
| 7   | <i>PARM1</i>            | Prostate androgen-regulated mucin-like protein 1                                      | 37.7              | 1.0 × 10 <sup>-9</sup>  |
| 8   | <i>GADD45G</i>          | Growth arrest and DNA-damage-inducible, gamma                                         | 35.1              | 5.3 × 10 <sup>-10</sup> |
| 9   | <i>CREBRF</i>           | CREB3 regulatory factor                                                               | 34.6              | 1.7 × 10 <sup>-11</sup> |
| 10  | <i>DNAJB9</i>           | DnaJ (Hsp40) homolog, subfamily B, member 9                                           | 34.6              | 2.8 × 10 <sup>-11</sup> |
| 11  | <i>PTGS2</i>            | Prostaglandin-endoperoxide synthase 2 (prostaglandin G/H synthase and cyclooxygenase) | 33.8              | 1.7 × 10 <sup>-7</sup>  |
| 12  | <i>RASGEF1B</i>         | RasGEF domain family member 1B                                                        | 32.5              | 1.9 × 10 <sup>-9</sup>  |
| 13  | <i>TM4SF19-TCTEX1D2</i> | TM4SF19-TCTEX1D2 readthrough (NMD candidate)                                          | 30.4              | 9.6 × 10 <sup>-11</sup> |
| 14  | <i>TM4SF19</i>          | Transmembrane 4 L six family member 19                                                | 30.3              | 7.0 × 10 <sup>-10</sup> |
| 15  | <i>GEM</i>              | GTP binding protein overexpressed in skeletal muscle                                  | 26.7              | 1.8 × 10 <sup>-10</sup> |
| 16  | <i>ARC</i>              | Activity-regulated cytoskeleton-associated protein                                    | 25.5              | 3.1 × 10 <sup>-9</sup>  |
| 17  | <i>AGR2</i>             | Anterior gradient 2, protein disulphide isomerase family member                       | 22.4              | 5.2 × 10 <sup>-9</sup>  |
| 18  | <i>NR1D1</i>            | Nuclear receptor subfamily 1, group D, member 1                                       | 21.0              | 6.2 × 10 <sup>-11</sup> |
| 19  | <i>ZFAND2A</i>          | Zinc finger, AN1-type domain 2A                                                       | 20.3              | 4.1 × 10 <sup>-10</sup> |
| 20  | <i>ATF3</i>             | Activating transcription factor 3                                                     | 20.0              | 2.2 × 10 <sup>-9</sup>  |
| 21  | <i>HSPB8</i>            | Heat shock 22kDa protein 8                                                            | 20.0              | 3.1 × 10 <sup>-9</sup>  |
| 22  | <i>RRAD</i>             | Ras-related associated with diabetes                                                  | 19.0              | 9.2 × 10 <sup>-9</sup>  |
| 23  | <i>SPX</i>              | Spexin hormone                                                                        | 18.5              | 1.8 × 10 <sup>-8</sup>  |
| 24  | <i>RGS2</i>             | Regulator of G-protein signaling 2                                                    | 18.4              | 6.0 × 10 <sup>-9</sup>  |
| 25  | <i>TRIB3</i>            | Tribbles pseudokinase 3                                                               | 18.3              | 1.4 × 10 <sup>-9</sup>  |
| 26  | <i>HSPA1A</i>           | Heat shock 70kDa protein 1A; heat shock 70kDa protein 1B                              | 17.8              | 3.1 × 10 <sup>-10</sup> |
| 27  | <i>OLAH</i>             | Oleoyl-ACP hydrolase                                                                  | 16.1              | 1.1 × 10 <sup>-8</sup>  |
| 28  | <i>RHOB</i>             | Ras homolog family member B                                                           | 15.9              | 4.7 × 10 <sup>-8</sup>  |
| 29  | <i>MMP1</i>             | Matrix metalloproteinase 1                                                            | 15.2              | 1.1 × 10 <sup>-9</sup>  |
| 30  | <i>KDM6B</i>            | Lysine (K)-specific demethylase 6B                                                    | 15.0              | 5.7 × 10 <sup>-9</sup>  |
| 31  | <i>HSPA1B</i>           | Heat shock 70kDa protein 1B; heat shock 70kDa protein 1A                              | 15.0              | 3.6 × 10 <sup>-10</sup> |
| 32  | <i>CLEC2B</i>           | C-type lectin domain family 2, member B                                               | 14.7              | 5.9 × 10 <sup>-9</sup>  |
| 33  | <i>GABARAPL1</i>        | GABA(A) receptor-associated protein like 1                                            | 14.6              | 4.7 × 10 <sup>-10</sup> |
| 34  | <i>LURAPIL</i>          | Leucine rich adaptor protein 1-like                                                   | 14.4              | 1.2 × 10 <sup>-8</sup>  |
| 35  | <i>BEX2</i>             | Brain expressed X-linked 2                                                            | 13.4              | 3.3 × 10 <sup>-8</sup>  |
| 36  | <i>MXD1</i>             | MAX dimerization protein 1                                                            | 13.4              | 3.9 × 10 <sup>-10</sup> |
| 37  | <i>VPS11</i>            | VPS11, CORVET/HOPS core subunit [Source:HGNC]                                         | 12.6              | 7.1 × 10 <sup>-10</sup> |

|                                 |                 |                                                      |      |                       |
|---------------------------------|-----------------|------------------------------------------------------|------|-----------------------|
|                                 |                 | Symbol;Acc:HGNC:14583]                               |      |                       |
| 38                              | <i>NPY1R</i>    | Neuropeptide Y receptor Y1                           | 12.5 | $3.1 \times 10^{-9}$  |
| 39                              | <i>TNFSF9</i>   | Tumor necrosis factor (ligand) superfamily, member 9 | 12.4 | $2.6 \times 10^{-8}$  |
| 40                              | <i>KLHL24</i>   | Kelch-like family member 24                          | 12.0 | $1.5 \times 10^{-8}$  |
| 41                              | <i>SAT1</i>     | Spermidine/spermine N1-acetyltransferase 1           | 11.7 | $1.0 \times 10^{-7}$  |
| 42                              | <i>PLIN2</i>    | Perilipin 2                                          | 11.6 | $2.2 \times 10^{-9}$  |
| 43                              | <i>CXCL8</i>    | Chemokine (C-X-C motif) ligand 8                     | 11.6 | $4.6 \times 10^{-9}$  |
| 44                              | <i>ADM</i>      | Adrenomedullin                                       | 11.6 | $1.4 \times 10^{-9}$  |
| 45                              | <i>ERO1B</i>    | Endoplasmic reticulum oxidoreductase beta            | 11.5 | $6.0 \times 10^{-9}$  |
| 46                              | <i>DEDD2</i>    | Death effector domain containing 2                   | 11.4 | $1.5 \times 10^{-9}$  |
| 47                              | <i>ZNF844</i>   | Zinc finger protein 844                              | 11.2 | $5.1 \times 10^{-9}$  |
| 48                              | <i>MAP1LC3B</i> | Microtubule-associated protein 1 light chain 3 beta  | 11.1 | $5.3 \times 10^{-10}$ |
| 49                              | <i>DUSP10</i>   | Dual specificity phosphatase 10                      | 10.9 | $7.7 \times 10^{-10}$ |
| 50                              | <i>DNAJB1</i>   | DnaJ (Hsp40) homolog, subfamily B, member 1          | 10.7 | $2.7 \times 10^{-9}$  |
| ECM receptor interaction signal |                 |                                                      |      |                       |
|                                 | <i>TNC</i>      | Tenascin C                                           | 3.9  | $6.6 \times 10^{-8}$  |
|                                 | <i>SPP1</i>     | Secreted phosphoprotein 1                            | 2.9  | 0.0001                |
|                                 | <i>LAMAI</i>    | Laminin, alpha 1                                     | 6.5  | $8.8 \times 10^{-6}$  |

<sup>a</sup> Among all 1,293 upregulated genes with significant alterations, the top 50 genes (fold) with 3 genes belonging to ECM receptor interaction signal were shown. <sup>b</sup> Fold change of gene expression in MDA-MB-231 cells with FxOH treatment, compared with that of control cells. <sup>c</sup> Significant difference between MDA-MB-231 cells with and without FxOH treatment using one-way ANOVA ( $n=3$ ).
