# Supplementary material
Source: MDPI journal article supplement (https://www.mdpi.com/2673-7523/2/3/10)
Supplement: s1 [file s1]

# Supplementary Table S1.

*Upregulated gene profile in human breast cancer MCF-7 cells with fucoxanthinol (FxOH) treatment.<sup>a</sup>*

| No. | Gene symbol         | Description                                                                                 | Fold <sup>b</sup> | p-Value <sup>c</sup>    |
|-----|---------------------|---------------------------------------------------------------------------------------------|-------------------|-------------------------|
| 1   | <i>HMOX1</i>        | Heme oxygenase 1                                                                            | 419.6             | 9.2 × 10 <sup>-13</sup> |
| 2   | <i>DDIT3</i>        | DNA-damage-inducible transcript 3                                                           | 229.4             | 7.0 × 10 <sup>-12</sup> |
| 3   | <i>CYP1A1</i>       | Cytochrome P450, family 1, subfamily A, polypeptide 1                                       | 190.5             | 2.8 × 10 <sup>-10</sup> |
| 4   | <i>HSPA6</i>        | Heat shock 70kDa protein 6 (HSP70B)                                                         | 175.3             | 1.8 × 10 <sup>-8</sup>  |
| 5   | <i>ATF3</i>         | Activating transcription factor 3                                                           | 164.7             | 5.3 × 10 <sup>-11</sup> |
| 6   | <i>FAM129A</i>      | Family with sequence similarity 129, member A                                               | 130.3             | 2.4 × 10 <sup>-8</sup>  |
| 7   | <i>SLC7A11</i>      | Solute carrier family 7 (anionic amino acid transporter light chain, xc- system), member 11 | 114.2             | 9.4 × 10 <sup>-12</sup> |
| 8   | <i>GEM</i>          | GTP binding protein overexpressed in skeletal muscle                                        | 78.4              | 3.6 × 10 <sup>-10</sup> |
| 9   | <i>AKRIC1</i>       | Aldo-keto reductase family 1, member C1                                                     | 71.9              | 8.3 × 10 <sup>-11</sup> |
| 10  | <i>GADD45A</i>      | Growth arrest and DNA-damage-inducible, alpha                                               | 63.8              | 8.1 × 10 <sup>-11</sup> |
| 11  | <i>GABARAPL1</i>    | GABA(A) receptor-associated protein like 1                                                  | 57.8              | 2.2 × 10 <sup>-10</sup> |
| 12  | <i>IL1RL1</i>       | Interleukin 1 receptor-like 1                                                               | 46.5              | 2.0 × 10 <sup>-7</sup>  |
| 13  | <i>MAP1B</i>        | Microtubule associated protein 1B                                                           | 45.3              | 2.1 × 10 <sup>-10</sup> |
| 14  | <i>ETV5</i>         | Ets variant 5                                                                               | 44.7              | 2.6 × 10 <sup>-9</sup>  |
| 15  | <i>PPP1R15A</i>     | Protein phosphatase 1, regulatory subunit 15A                                               | 44.6              | 1.3 × 10 <sup>-9</sup>  |
| 16  | <i>DNAJB9</i>       | DnaJ (Hsp40) homolog, subfamily B, member 9                                                 | 44.0              | 7.7 × 10 <sup>-10</sup> |
| 17  | <i>NR1D1</i>        | Nuclear receptor subfamily 1, group D, member 1                                             | 40.6              | 7.9 × 10 <sup>-10</sup> |
| 18  | <i>AKRIC2</i>       | Aldo-keto reductase family 1, member C2                                                     | 39.3              | 5.7 × 10 <sup>-10</sup> |
| 19  | <i>RFPL4A</i>       | Ret finger protein-like 4A                                                                  | 36.7              | 2.0 × 10 <sup>-8</sup>  |
| 20  | <i>HSPB8</i>        | Heat shock 22kDa protein 8                                                                  | 36.6              | 1.0 × 10 <sup>-10</sup> |
| 21  | <i>FKBP14</i>       | FK506 binding protein 14                                                                    | 33.7              | 2.9 × 10 <sup>-10</sup> |
| 22  | <i>MMP13</i>        | Matrix metalloproteinase 13                                                                 | 30.0              | 8.3 × 10 <sup>-9</sup>  |
| 23  | <i>BHLHE41</i>      | Basic helix-loop-helix family, member e41                                                   | 29.6              | 1.0 × 10 <sup>-9</sup>  |
| 24  | <i>TNFAIP3</i>      | Tumor necrosis factor, alpha-induced protein 3                                              | 28.9              | 1.1 × 10 <sup>-9</sup>  |
| 25  | <i>CREBRF</i>       | CREB3 regulatory factor                                                                     | 27.3              | 5.9 × 10 <sup>-9</sup>  |
| 26  | <i>IL6R</i>         | Interleukin 6 receptor                                                                      | 26.8              | 1.1 × 10 <sup>-8</sup>  |
| 27  | <i>SPX</i>          | Spexin hormone                                                                              | 23.0              | 1.6 × 10 <sup>-8</sup>  |
| 28  | <i>SAT1</i>         | Spermidine/spermine N1-acetyltransferase 1                                                  | 22.5              | 4.8 × 10 <sup>-10</sup> |
| 29  | <i>RGS2</i>         | Regulator of G-protein signaling 2                                                          | 21.8              | 3.0 × 10 <sup>-8</sup>  |
| 30  | <i>REXO1L10P</i>    | REX1, RNA exonuclease 1 homolog-like 10, pseudogene                                         | 21.6              | 2.6 × 10 <sup>-7</sup>  |
| 31  | <i>ZFAND2A</i>      | Zinc finger, AN1-type domain 2A                                                             | 21.4              | 4.3 × 10 <sup>-10</sup> |
| 32  | <i>GTPBP2</i>       | GTP binding protein 2                                                                       | 21.1              | 1.2 × 10 <sup>-8</sup>  |
| 33  | <i>ZNF165</i>       | Zinc finger protein 165                                                                     | 19.9              | 2.9 × 10 <sup>-9</sup>  |
| 34  | <i>MMP10</i>        | Matrix metalloproteinase 10                                                                 | 19.8              | 3.9 × 10 <sup>-7</sup>  |
| 35  | <i>MMP1</i>         | Matrix metalloproteinase 1                                                                  | 19.6              | 2.7 × 10 <sup>-8</sup>  |
| 36  | <i>RFPL4AL1</i>     | Ret finger protein-like 4A-like 1                                                           | 19.6              | 1.1 × 10 <sup>-8</sup>  |
| 37  | <i>FKBP11; ARF3</i> | FK506 binding protein 11; ADP-ribosylation factor 3                                         | 19.4              | 1.4 × 10 <sup>-9</sup>  |
| 38  | <i>ERO1B</i>        | Endoplasmic reticulum oxidoreductase beta                                                   | 19.1              | 1.9 × 10 <sup>-8</sup>  |
| 39  | <i>DNAJB4</i>       | DnaJ (Hsp40) homolog, subfamily B, member 4                                                 | 18.3              | 2.1 × 10 <sup>-9</sup>  |
| 40  | <i>HSPA13</i>       | Heat shock protein 70kDa family, member 13                                                  | 18.3              | 3.4 × 10 <sup>-9</sup>  |

|                                 |               |                                                            |      |                       |
|---------------------------------|---------------|------------------------------------------------------------|------|-----------------------|
| 41                              | <i>TRIB3</i>  | Tribbles pseudokinase 3                                    | 17.9 | $1.7 \times 10^{-9}$  |
| 42                              | <i>FOSL1</i>  | FOS-like antigen 1                                         | 17.9 | $5.2 \times 10^{-8}$  |
| 43                              | <i>GCLM</i>   | Glutamate-cysteine ligase, modifier subunit                | 17.6 | $7.6 \times 10^{-10}$ |
| 44                              | <i>ANXA1</i>  | Annexin A1                                                 | 17.2 | $3.2 \times 10^{-8}$  |
| 45                              | <i>CHAC1</i>  | ChaC glutathione-specific gamma-glutamylcyclotransferase 1 | 17.2 | $2.3 \times 10^{-8}$  |
| 46                              | <i>LAMP3</i>  | Lysosomal-associated membrane protein 3                    | 16.6 | $1.6 \times 10^{-8}$  |
| 47                              | <i>HBEGF</i>  | Heparin-binding EGF-like growth factor                     | 16.4 | $3.0 \times 10^{-10}$ |
| 48                              | <i>TSPYL2</i> | TSPY-like 2                                                | 16.1 | $4.2 \times 10^{-9}$  |
| 49                              | <i>DEDD2</i>  | Death effector domain containing 2                         | 15.6 | $1.1 \times 10^{-8}$  |
| 50                              | <i>LSMEM1</i> | Leucine-rich single-pass membrane protein 1                | 15.6 | $1.3 \times 10^{-8}$  |
| ECM receptor interaction signal |               |                                                            |      |                       |
| 1                               | <i>LAMC2</i>  | Laminin, gamma 2                                           | 5.1  | $3.7 \times 10^{-8}$  |
| 2                               | <i>ITGA6</i>  | Integrin alpha 6                                           | 3.6  | $2.3 \times 10^{-6}$  |

<sup>a</sup> Among all 1,579 upregulated genes with significant alterations, the top 50 genes (fold) with 2 genes belonging to ECM receptor interaction signal were shown. <sup>b</sup> Fold change of gene expression in MCF-7 cells with FxOH treatment, compared with that of control cells. <sup>c</sup> Significant difference between MCF-7 cells with and without FxOH treatment using one-way ANOVA ( $n=3$ ).
